# Supplementary material
Source: Springer Nature journal article supplement (https://www.springermedizin.de/resource/supplementary/12902_2014_252_MOESM2_ESM.pdf/9515878)

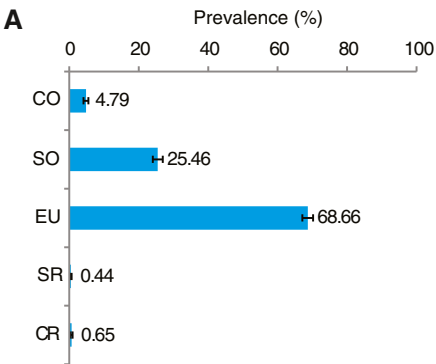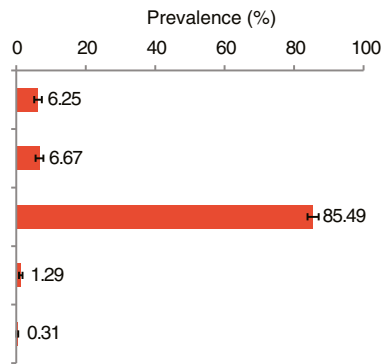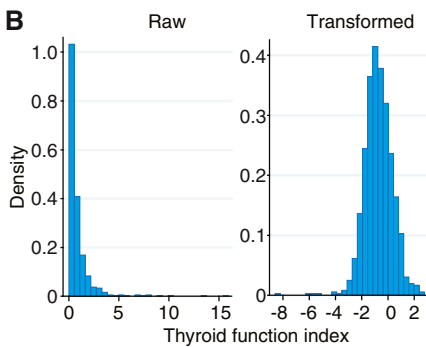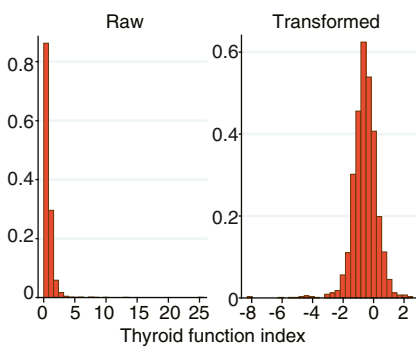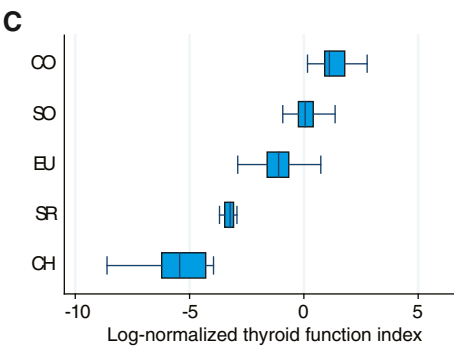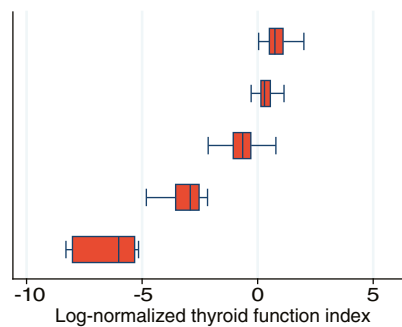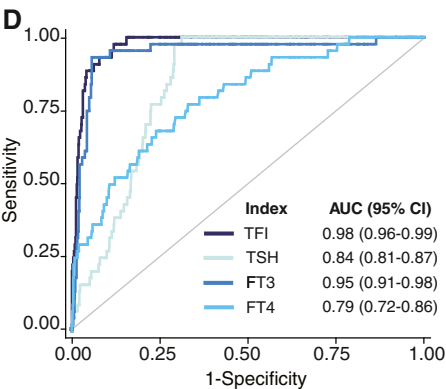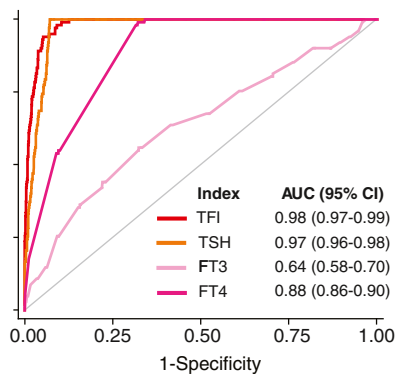

Supplement: MOESM2 [file 9515878]
